# Supplementary material for: Scientific opinion on the relationship between intake of alpha‐lipoic acid (thioctic acid) and the risk of insulin autoimmune syndrome
Source: PubMed Central journal article supplement (PMC8173454; doi:10.2903/j.efsa.2021.6577), 2021-06-03
Supplement: EFS2-19-e06577-s001.pdf [file EFS2-19-e06577-s001.pdf]

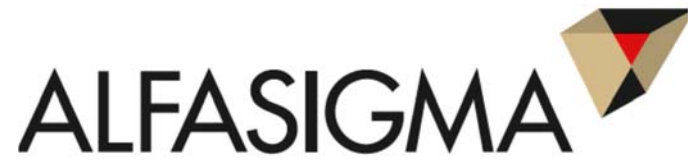

**LIPOIC ACID**

**ALFASIGMA POST-MARKETING SURVEILLANCE  
REPORT**

## Background

On 28 January 2021 EFSA has launched an open consultation on its draft opinion on alpha-lipoic acid to discuss data on the relationship between intake of alpha-lipoic acid and the risk of insulin autoimmune syndrome (IAS) and investigates whether a dose may be set below which ALA added to foods is not expected to cause IAS in the general population or in vulnerable subgroups.

Alfasigma commercializes food supplements containing Alpha-Lipoic Acid (ALA) in many countries, and set up a Post-marketing Surveillance System to collect undesirable effects of food supplements. Objective of this report is to share with EFSA the Alfasigma post-marketing surveillance safety data.

## Alfasigma Food Supplements containing Alpha Lipoic Acid (ALA)

Alfasigma distributes and sells food supplements containing Alpha-Lipoic Acid (ALA) in association to other components such as Omega-3, Superoxide dismutase (SOD), Honokiol (a lignan isolated from the bark, seed cones, and leaves of trees belonging to the genus Magnolia) vitamins E, B1, B2, B5, B6, Selenium and Magnesium. The exact composition of each product is reported in Table 1 (A-B-C-D).

**Table 1. ALA-Line compositions**

| <b>A) ALANERV</b>  |                        |
|--------------------|------------------------|
| <b>INGREDIENTS</b> | <b>DOSAGE 2 caps/d</b> |
| Lipoic Acid        | 600 mg                 |
| Omega-3            | 360 mg                 |
| Vitamin E          | 15 mg                  |
| Vitamin B5         | 9 mg                   |
| Vitamin B6         | 2.8 mg                 |
| Vitamin B2         | 2.4 mg                 |
| Vitamin B1         | 2.1 mg                 |
| Selenium           | 50 mcg                 |

| <b>B) ALANERV ON</b> |                        |
|----------------------|------------------------|
| <b>INGREDIENTS</b>   | <b>DOSAGE 2 caps/d</b> |
| Lipoic Acid          | 600 mg                 |
| Omega-3              | 360 mg                 |
| Honokiol             | 54 mg                  |
| Vitamin E            | 15 mg                  |
| Vitamin B5           | 9 mg                   |
| Vitamin B6           | 2.8 mg                 |
| Vitamin B2           | 2.4 mg                 |
| Vitamin B1           | 2.1 mg                 |
| Selenium             | 50 mcg                 |

| <b>C) ALA SOD 600</b> |                       |
|-----------------------|-----------------------|
| <b>INGREDIENTS</b>    | <b>DOSAGE 1 cpr/d</b> |
| Lipoic Acid           | 600 mg                |
| SOD                   | 140 UI                |
| Vitamin E             | 7.5 mg                |
| Selenium              | 25 mcg                |

| <b>D) ALANERV AGE</b> |                        |
|-----------------------|------------------------|
| <b>INGREDIENTS</b>    | <b>DOSAGE 2 caps/d</b> |
| Lipoic Acid           | 600 mg                 |
| Omega-3               | 333.33 mg              |
| Vitamin E             | 12 mg                  |
| Vitamin D             | 5 mcg                  |
| Magnesium             | 56.25 mg               |

These products are commercialized in several countries (Italy, Portugal, Poland, Spain, Romania, Malaysia). As reported in the table 2.

**Table 2. ALA-Line (Alfa Lipoic Acid – Line)**

| Country  | Product     | Launch date |
|----------|-------------|-------------|
| ITALY    | ALANERV     | 2006        |
|          | ALA SOD 600 | 2010        |
|          | ALANERV AGE | 2014        |
|          | ALANERV ON  | 2012        |
| SPAIN    | ALANERV     | 2006        |
|          | ALASOD      | 2012        |
|          | ALAON       | 2014        |
| PORTUGAL | ALANERV     | 2011        |
|          | ALA SOD 600 | 2013        |
| POLAND   | ALANERV     | 2006        |
| TUNISIA  | ALANERV     | 2010        |
| MALAYSIA | ALANERV     | 2014        |
| ROMANIA  | ALANERV     | 2009        |
|          | ALA SOD 600 | 2016        |

The table below (Table 3) shows Alfasigma internal sales data regarding ALA brand family in Volume Packs from MAT December 2017 to MAT December 2019 and the cumulative total of the three years

**Table 3. Internal sales data**

| Volume in PACKS [Absolute]                                        |            |                |                  |                  |                  |
|-------------------------------------------------------------------|------------|----------------|------------------|------------------|------------------|
| Brand Name                                                        | Market/CTY | 2017           | 2018             | 2019             | Total 3YRS       |
| <b>Total ALA Line ROMANIA+ITALY+SPAIN+POLAND+PORTUGAL+TUNISIA</b> |            | <b>949.241</b> | <b>1.104.819</b> | <b>1.136.306</b> | <b>3.190.366</b> |
| <b>Total ALA Line ROMANIA</b>                                     |            | <b>360.626</b> | <b>455.252</b>   | <b>507.604</b>   | <b>1.323.482</b> |
| ALANERV 920 MG 20 CPS AWI RUM                                     | Romania    | 330.686        | 404.117          | 230.444          | 965.247          |
| ALANERV 920 MG 20 CPS RUM                                         | Romania    |                |                  | 214.653          | 214.653          |
| ALA600- SOD 20CPR AW RO                                           | Romania    | 29.940         | 51.135           | 62.507           | 143.582          |
| <b>Total ALA Line ITALY</b>                                       |            | <b>243.536</b> | <b>234.427</b>   | <b>213.212</b>   | <b>691.175</b>   |
| ALANERV 20 Cps                                                    | Italy      | 94.322         | 92.439           | 85.064           | 271.825          |
| ALA 600-SOD 20 CPR                                                | Italy      | 72.944         | 68.716           | 57.627           | 199.287          |
| ALANERV AGE 20 CPS                                                | Italy      | 47.206         | 45.919           | 49.763           | 142.888          |
| ALANERV ON 20 CPS                                                 | Italy      | 29.064         | 27.353           | 20.758           | 77.175           |
| <b>Total ALA Line SPAIN</b>                                       |            | <b>199.225</b> | <b>215.528</b>   | <b>212.248</b>   | <b>627.001</b>   |
| ALAON 30 soft cap.                                                | Spain      | 65.219         | 79.968           | 85.673           | 230.860          |
| ALASOD 20 tab.                                                    | Spain      | 64.905         | 72.713           | 72.366           | 209.984          |
| ALANERV 30 soft cap.                                              | Spain      | 59.879         | 55.066           | 47.677           | 162.622          |
| ALANERV 20 soft cap.                                              | Spain      | 9.222          | 7.781            | 6.532            | 23.535           |
| <b>Total ALA Line POLAND</b>                                      |            | <b>100.850</b> | <b>147.659</b>   | <b>147.850</b>   | <b>396.359</b>   |
| ALANERV 30 CAPS                                                   | Poland     | 100.850        | 99.755           | 83.150           | 283.755          |
| ALANERV ON 30 CPS                                                 | Poland     |                | 47.904           | 64.700           | 112.604          |
| <b>Total ALA Line PORTUGAL</b>                                    |            | <b>32.008</b>  | <b>34.278</b>    | <b>35.392</b>    | <b>101.678</b>   |
| MR_PT_Alanerv 30 caps                                             | Portugal   |                | 10.521           | 26.806           | 37.327           |
| MR_PT_ALA600SOD                                                   | Portugal   |                | 3.455            | 8.586            | 12.041           |
| ALANERV 30 CAPS                                                   | Portugal   | 23.342         | 14.793           |                  | 38.135           |
| ALA600SOD                                                         | Portugal   | 8.666          | 5.509            |                  | 14.175           |
| <b>Total ALA Line TUNISIA</b>                                     |            | <b>12.996</b>  | <b>17.675</b>    | <b>20.000</b>    | <b>50.671</b>    |
| ALANERV 920 MG 20 CPS TN                                          | Tunisia    | 12.996         | 17.675           | 20.000           | 50.671           |

## Data source

In order to monitor the safety of these products, Alfasigma set up a Post-marketing Surveillance System to collect undesirable effects of food supplements.

The surveillance system consists in the collection in the Safety Database of spontaneous reports of suspected undesirable effects that occurred after taking food supplements and their evaluation. Reports can be sent from anybody observing a suspected undesirable effects associated with these products (physicians, pharmacists or consumers), by email and phone call. Each incoming report is analyzed taking into consideration type of event<sup>1</sup>, medical history, laboratory tests, concomitant medications or food, temporal plausibility and all other available information useful to evaluate the causal relationship<sup>2</sup> between the event and the product.

## Data analysis

From January 2010 to September 2020 a total of 100 reports concerning Alpha-Lipoic Acid, including 213 adverse effects, were collected in the safety database, 92 from European countries (34 Italy, 18 Portugal, 6 Poland, 33 Spain and 1 Romania) and 8 from extra-EU country (Malaysia).

These reports were mostly received from physicians (39%), pharmacists (18%) and other health professionals.

**Table 4. Safety reports received for each ALA-Line product**

| <b>Product</b> | <b>n° of safety reports (%)</b> |
|----------------|---------------------------------|
| Alanerv        | 44 (44%)                        |
| Ala SOD 600    | 41 (41%)                        |
| Alanerv ON     | 11 (11%)                        |
| Alanerv AGE    | 1 (1%)                          |
| <b>TOTAL</b>   | <b>100 (100%)</b>               |

Up to September 2020 **no case Insulin autoimmune syndrome (IAS) or Hirata disease were received** after taking one of our food supplements containing ALA.

<sup>1</sup> Codified according to WHO-UMC system

<sup>2</sup> Codified according to Medical Dictionary for Regulatory Activities (MedDRA)
